# Supplementary material
Source: PubMed Central journal article supplement (PMC4982829)
Supplement: NIHMS759819-supplement.pdf [file NIHMS759819-supplement.pdf]

## **Supplemental Materials for**

### **AF Genetics: Is There a Practical Clinical Value Now or In The Future?**

William J. Hucker, MD, PhD, Harsimran Saini, MD, PhD, Steven A. Lubitz, MD, MPH and  
Patrick T. Ellinor, MD, PhD

Cardiac Arrhythmia Service & Cardiovascular Research Center,  
Massachusetts General Hospital, Boston, MA, USA

**Short title:** Clinical Applications of AF Genetics

**Disclosures:** Dr. Ellinor is the PI on a grant from Bayer HealthCare to the Broad Institute focused on the genetics and therapeutics of atrial fibrillation.

**Corresponding author:**

Patrick T. Ellinor, MD, PhD  
Cardiac Arrhythmia Service &  
Cardiovascular Research Center  
Massachusetts General Hospital;  
Program in Medical and Population Genetics  
The Broad Institute of Harvard and MIT  
T: 617-724-8729  
E: [ellinor@mgh.harvard.edu](mailto:ellinor@mgh.harvard.edu)

**Supplemental Table S1. Rare variants associated with AF**

| <i>Gene</i>                  | Gene product                                                    | Presumed mechanism of action               | Reference       |
|------------------------------|-----------------------------------------------------------------|--------------------------------------------|-----------------|
| <b>Potassium Channels</b>    |                                                                 |                                            |                 |
| <i>KCNQ1</i>                 | $\alpha$ -subunit of $K_v7.1$ channel                           | Increased $I_{Ks}$                         | 1-8             |
| <i>KCNE1</i>                 | $\beta$ -subunit of $K_v7.1$ channel (minK)                     | Increased $I_{Ks}$                         | 9, 10           |
| <i>KCNE2</i>                 | $\beta$ -subunit of $K_v7.1$ channel (MiRP1)                    | Increased $I_{Ks}$                         | 11,12           |
| <i>KCNE5</i>                 | $\beta$ -subunit of $K_v7.1$ channel                            | Increased $I_{Ks}$                         | 13              |
| <i>KCNJ2</i>                 | $\beta$ -subunit of $K_{ir}2.1$ channel                         | Increased $I_{K1}$                         | 14-16           |
| <i>KCNA5</i>                 | $\alpha$ -subunit of $K_{v1.5}$ channel                         | Modulation of $I_{Kur}$                    | 11, 17, 18      |
| <i>KCNH2</i>                 | $\alpha$ -subunit of $K_v11.1$ channel (HERG)                   | Modulation of $I_{Kr}$                     | 19, 20          |
| <i>KCND3</i>                 | $\alpha$ -subunit of $K_{v4.3}$ channel                         | Increased $I_{to}$ current                 | 21              |
| <i>KCNJ8</i>                 | $\alpha$ -subunit of $K_{ir}6.1$ channel                        | Increased $I_{KATP}$                       | 22              |
| <i>KCNN3</i>                 | Ca activated K channel $KCa2.3$                                 | Modulation of $SK_{Ca}$ current            | 23, 24          |
| <i>HCN4</i>                  | Hyperpolarization activated cyclic nucleotide gated K channel 4 | Modulation of the pacemaking $I_f$ current | 25              |
| <i>ABCC9</i>                 | SUR2A subunit of $K_{ATP}$ channel                              | Decreased $I_{KATP}$                       | 26              |
| <b>Sodium Channels</b>       |                                                                 |                                            |                 |
| <i>SCN5A</i>                 | $\alpha$ -subunit of $Na_v1.5$                                  | Modulation of $I_{Na}$                     | 27-29<br>30, 31 |
| <i>SCN1B</i>                 | $\beta$ -subunit of $Na_v1.5$                                   | Reduced $I_{Na}$                           | 32<br>33        |
| <i>SCN2B</i>                 | $\beta$ -subunit of $Na_v1.5$                                   | Reduced $I_{Na}$                           | 32              |
| <i>SCN3B</i>                 | $\beta$ -subunit of $Na_v1.5$                                   | Reduced $I_{Na}$                           | 27, 34          |
| <i>SCN4B</i>                 | $\beta$ -subunit of $Nav1.5$                                    | Not characterized                          | 35              |
| <i>SCN10A</i>                | $\alpha$ -subunit of $Na_v1.5$                                  | Modulation of $Na_v1.5$                    | 36, 37          |
| <b>Other Candidate Genes</b> |                                                                 |                                            |                 |
| <i>NUP155</i>                | Nucleoporin                                                     | Reduced nuclear membrane permeability      | 38              |

|             |                                            |                                            |           |
|-------------|--------------------------------------------|--------------------------------------------|-----------|
| <i>GJA1</i> | Connexin-43 (Cx43)                         | Reduced intercellular electrical coupling  | 39        |
| <i>GJA5</i> | Connexin-40 (Cx40)                         | Impaired intercellular electrical coupling | 40-42     |
| <i>NPPA</i> | Naturetic peptide precursor A              | Altered ANP signaling                      | 43-45     |
| ZFHX3       | Transcription Factor: ATBF-1               | Altered binding activity                   | 46        |
| SYNE2       | Nesepirin-2                                | Altered expression                         | 46, 47    |
| C9orf3      | Aminopeptidase-O                           | Altered expression                         | 46, 47    |
| GATA4       | Transcription Factor: cardiogenesis        | Decreased activity                         | 48-50     |
| GATA5       | Transcription Factor: cardiogenesis        | Decreased activity                         | 51-53     |
| GATA6       | Transcription Factor: cardiogenesis        | Decreased activity                         | 54-56     |
| NKX2-5      | Transcription Factor: cardiogenesis        | Decreased activity                         | 57-59     |
| JPH2        | Junctophilin-2: modulation of RyR activity | Decreased RyR stabilization                | 60        |
| CAV1        | Caveolin 1/2                               | Altered ion channel signaling              | 61, 62    |
| PITX2       | Transcription Factor: cardiogenesis        | decreased activity                         | 46, 63-65 |
| RYR2        | Ryanodine Receptor                         | Increased activity                         | 66, 67    |

**Supplemental Table S2. Genetic loci associated with AF in Genome Wide Association Studies.**

| <b>SNP</b> | <b>Chromosome</b> | <b>Closest Gene</b>       | <b>Relative Position</b> | <b>Gene Function</b>               | <b>Reference(s)</b> |
|------------|-------------------|---------------------------|--------------------------|------------------------------------|---------------------|
| rs13376333 | 1q21              | <i>KCNN3</i>              | Intronic                 | Ca-activated K channel             | 68                  |
| rs3903239  | 1q24              | <i>PRRX1</i>              | 46kb Upstream            | Transcription Factor               | 69                  |
| rs6817105  | 4q25              | <i>PITX2</i>              | 150kb Upstream           | Transcription Factor               | 69, 70              |
| rs3807989  | 7q31              | <i>CAV1/2</i>             | Intronic                 | Cell membrane protein Caveolin 1/2 | 69                  |
| rs10821415 | 9q22              | <i>C9orf3</i>             | Intronic                 | Aminopeptidase-O                   | 69                  |
| rs10824026 | 10q22             | <i>MYOZ1/<br/>SYNPO2L</i> | 5kb Upstream             | Z-disk protein Myozenin-1          | 69                  |
| rs1152591  | 14q23             | <i>SYNE2</i>              | Intronic                 | Sarcomeric protein Neseprin-2      | 69                  |
| rs7164883  | 15q24             | <i>HCN4</i>               | Intronic                 | Funny current channel              | 69                  |
| rs2106261  | 16q22             | <i>ZFHX3</i>              | Intronic                 | Transcription Factor               | 71                  |
| rs6584555  | 10q24             | <i>NEURL</i>              | Intronic                 | E3 Ubiquitin Ligase                | 72                  |
| rs10507248 | 12q24             | <i>TBX5</i>               | Intronic                 | Transcription Factor               | 72                  |
| rs4642101  | 3p25              | <i>CAND2</i>              | Intronic                 | Ubiquination scaffold              | 72                  |
| rs13216675 | 6q22              | <i>GJA1</i>               | 670 kb Upstream          | Gap junction protein Connexin 43   | 72                  |
| rs6490029  | 12q24             | <i>CUX2</i>               | Intronic                 | Transcription Factor               | 72                  |

## References

1. Chen YH, Xu SJ, Bendahhou S, Wang XL, Wang Y, Xu WY, Jin HW, Sun H, Su XY, Zhuang QN, Yang YQ, Li YB, Liu Y, Xu HJ, Li XF, Ma N, Mou CP, Chen Z, Barhanin J, Huang W. Kcnq1 gain-of-function mutation in familial atrial fibrillation. *Science*. 2003;299:251-254
2. Hong K, Piper DR, Diaz-Valdecantos A, Brugada J, Oliva A, Burashnikov E, Santos-de-Soto J, Grueso-Montero J, Diaz-Enfante E, Brugada P, Sachse F, Sanguinetti MC, Brugada R. De novo kcnq1 mutation responsible for atrial fibrillation and short qt syndrome in utero. *Cardiovasc.Res*. 2005;68:433-440
3. Das S, Makino S, Melman YF, Shea MA, Goyal SB, Rosenzweig A, Macrae CA, Ellinor PT. Mutation in the s3 segment of kcnq1 results in familial lone atrial fibrillation. *Heart Rhythm*. 2009;6:1146-1153
4. Christophersen IE, Budtz-Jorgensen E, Olesen MS, Haunso S, Christensen K, Svendsen JH. Familial atrial fibrillation predicts increased risk of mortality: A study in danish twins. *Circ Arrhythm Electrophysiol*. 2013;6:10-15
5. Hayashi K, Konno T, Tada H, Tani S, Liu L, Fujino N, Nohara A, Hodatsu A, Tsuda T, Tanaka Y, Kawashiri MA, Ino H, Makita N, Yamagishi M. Functional characterization of rare variants implicated in susceptibility to lone atrial fibrillation. *Circ Arrhythm Electrophysiol*. 2015;8:1095-1104
6. Hasegawa K, Ohno S, Ashihara T, Itoh H, Ding WG, Toyoda F, Makiyama T, Aoki H, Nakamura Y, Delisle BP, Matsuura H, Horie M. A novel kcnq1 missense mutation identified in a patient with juvenile-onset atrial fibrillation causes constitutively open iks channels. *Heart Rhythm*. 2014;11:67-75
7. Ki CS, Jung CL, Kim HJ, Baek KH, Park SJ, On YK, Kim KS, Noh SJ, Youm JB, Kim JS, Cho H. A kcnq1 mutation causes age-dependant bradycardia and persistent atrial fibrillation. *Pflugers Arch*. 2014;466:529-540
8. Bartos DC, Anderson JB, Bastiaenen R, Johnson JN, Gollob MH, Tester DJ, Burgess DE, Homfray T, Behr ER, Ackerman MJ, Guicheney P, Delisle BP. A kcnq1 mutation causes a high penetrance for familial atrial fibrillation. *J Cardiovasc Electrophysiol*. 2013;24:562-569
9. Olesen MS, Bentzen BH, Nielsen JB, Steffensen AB, David JP, Jabbari J, Jensen HK, Haunso S, Svendsen JH, Schmitt N. Mutations in the potassium channel subunit kcne1 are associated with early-onset familial atrial fibrillation. *BMC Med Genet*. 2012;13:24
10. Liang C, Li X, Xu Y, Chen Q, Wu Y, Wang W, Li W, Qiu M. Kcne1 rs1805127 polymorphism increases the risk of atrial fibrillation: A meta-analysis of 10 studies. *PLoS One*. 2013;8:e68690
11. Yang Y, Xia M, Jin Q, Bendahhou S, Shi J, Chen Y, Liang B, Lin J, Liu Y, Liu B, Zhou Q, Zhang D, Wang R, Ma N, Su X, Niu K, Pei Y, Xu W, Chen Z, Wan H, Cui J, Barhanin J, Chen Y. Identification of a kcne2 gain-of-function mutation in patients with familial atrial fibrillation. *Am J Hum.Genet*. 2004;75:899-905
12. Nielsen JB, Bentzen BH, Olesen MS, David JP, Olesen SP, Haunso S, Svendsen JH, Schmitt N. Gain-of-function mutations in potassium channel subunit kcne2 associated with early-onset lone atrial fibrillation. *Biomark Med*. 2014;8:557-570
13. Ravn LS, Aizawa Y, Pollevick GD, Hofman-Bang J, Cordeiro JM, Dixen U, Jensen G, Wu Y, Burashnikov E, Haunso S, Guerchicoff A, Hu D, Svendsen JH, Christiansen M, Antzelevitch C. Gain of function in iks secondary to a mutation in kcne5 associated with atrial fibrillation. *Heart Rhythm*. 2008;5:427-435
14. Deo M, Ruan Y, Pandit SV, Shah K, Berenfeld O, Blaufox A, Cerrone M, Noujaim SF, Denegri M, Jalife J, Priori SG. Kcnj2 mutation in short qt syndrome 3 results in atrial fibrillation and ventricular proarrhythmia. *Proc Natl Acad Sci U S A*. 2013;110:4291-4296

15. Hattori T, Makiyama T, Akao M, Ehara E, Ohno S, Iguchi M, Nishio Y, Sasaki K, Itoh H, Yokode M, Kita T, Horie M, Kimura T. A novel gain-of-function *knj2* mutation associated with short-qt syndrome impairs inward rectification of *kir2.1* currents. *Cardiovasc Res*. 2012;93:666-673
16. Xia M, Jin Q, Bendahhou S, He Y, Larroque MM, Chen Y, Zhou Q, Yang Y, Liu Y, Liu B, Zhu Q, Zhou Y, Lin J, Liang B, Li L, Dong X, Pan Z, Wang R, Wan H, Qiu W, Xu W, Eurlings P, Barhanin J. A *kir2.1* gain-of-function mutation underlies familial atrial fibrillation. *Biochem Biophys Res Commun*. 2005;332:1012-1019
17. Christophersen IE, Olesen MS, Liang B, Andersen MN, Larsen AP, Nielsen JB, Haunso S, Olesen SP, Tveit A, Svendsen JH, Schmitt N. Genetic variation in *kcna5*: Impact on the atrial-specific potassium current *ikur* in patients with lone atrial fibrillation. *Eur Heart J*. 2013;34:1517-1525
18. Olson TM, Alekseev AE, Liu XK, Park S, Zingman LV, Bienengraeber M, Sattiraju S, Ballew JD, Jahangir A, Terzic A. *Kv1.5* channelopathy due to *kcna5* loss-of-function mutation causes human atrial fibrillation. *Hum Mol Genet*. 2006;15:2185-2191
19. Hong K, Bjerregaard P, Gussak I, Brugada R. Short qt syndrome and atrial fibrillation caused by mutation in *kcnh2*. *J Cardiovasc. Electrophysiol*. 2005;16:394-396
20. Sinner MF, Pfeufer A, Akyol M, Beckmann BM, Hinterseer M, Wacker A, Perz S, Sauter W, Illig T, Nabauer M, Schmitt C, Wichmann HE, Schomig A, Steinbeck G, Meitinger T, Kaab S. The non-synonymous coding *ikr*-channel variant *kcnh2-k897t* is associated with atrial fibrillation: Results from a systematic candidate gene-based analysis of *kcnh2* (*herg*). *Eur Heart J*. 2008;29:907-914
21. Olesen MS, Refsgaard L, Holst AG, Larsen AP, Grubb S, Haunsø S, Svendsen JH, Olesen S-P, Schmitt N, Calloe K. A novel *kcnd3* gain-of-function mutation associated with early-onset of persistent lone atrial fibrillation. *Cardiovascular research*. 2013;98:488-495
22. Delaney JT, Muhammad R, Blair MA, Kor K, Fish FA, Roden DM, Darbar D. A *knj8* mutation associated with early repolarization and atrial fibrillation. *Europace*. 2012;14:1428-1432
23. Ling TY, Wang XL, Chai Q, Lau TW, Koestler CM, Park SJ, Daly RC, Greason KL, Jen J, Wu LQ, Shen WF, Shen WK, Cha YM, Lee HC. Regulation of the *sk3* channel by *microrna-499*--potential role in atrial fibrillation. *Heart Rhythm*. 2013;10:1001-1009
24. Mahida S, Mills RW, Tucker NR, Simonson B, Macri V, Lemoine MD, Das S, Milan DJ, Ellinor PT. Overexpression of *kcnn3* results in sudden cardiac death. *Cardiovasc Res*. 2014;101:326-334
25. Macri V, Mahida SN, Zhang ML, Sinner MF, Dolmatova EV, Tucker NR, McLellan M, Shea MA, Milan DJ, Lunetta KL, Benjamin EJ, Ellinor PT. A novel trafficking-defective *hcn4* mutation is associated with early-onset atrial fibrillation. *Heart Rhythm*. 2014;11:1055-1062
26. Olson TM, Alekseev AE, Moreau C, Liu XK, Zingman LV, Miki T, Seino S, Asirvatham SJ, Jahangir A, Terzic A. *Katp* channel mutation confers risk for vein of marshall adrenergic atrial fibrillation. *Nat Clin Pract Cardiovasc Med*. 2007;4:110-116
27. Olesen MS, Jespersen T, Nielsen JB, Liang B, Moller DV, Hedley P, Christiansen M, Varro A, Olesen SP, Haunso S, Schmitt N, Svendsen JH. Mutations in sodium channel beta-subunit *scn3b* are associated with early-onset lone atrial fibrillation. *Cardiovasc Res*. 2011;89:786-793
28. Ellinor PT, Nam EG, Shea MA, Milan DJ, Ruskin JN, MacRae CA. Cardiac sodium channel mutation in atrial fibrillation. *Heart Rhythm*. 2008;5:99-105
29. Darbar D, Kannankeril PJ, Donahue BS, Kucera G, Stubblefield T, Haines JL, George AL, Jr., Roden DM. Cardiac sodium channel (*scn5a*) variants associated with atrial fibrillation. *Circulation*. 2008;117:1927-1935
30. Ziyadeh-Isleem A, Clatot J, Duchatelet S, Gandjbakhch E, Denjoy I, Hidden-Lucet F, Hatem S, Deschenes I, Coulombe A, Neyroud N, Guicheney P. A truncating *scn5a* mutation combined with genetic variability causes sick sinus syndrome and early atrial fibrillation. *Heart Rhythm*. 2014;11:1015-1023

31. Olesen MS, Yuan L, Liang B, Holst AG, Nielsen N, Nielsen JB, Hedley PL, Christiansen M, Olesen SP, Haunso S, Schmitt N, Jespersen T, Svendsen JH. High prevalence of long qt syndrome-associated scn5a variants in patients with early-onset lone atrial fibrillation. *Circ Cardiovasc Genet*. 2012;5:450-459
32. Watanabe H, Darbar D, Kaiser DW, Jiramongkolchai K, Chopra S, Donahue BS, Kannankeril PJ, Roden DM. Mutations in sodium channel beta1- and beta2-subunits associated with atrial fibrillation. *Circ.Arrhythm.Electrophysiol*. 2009;2:268-275
33. Olesen MS, Holst AG, Svendsen JH, Haunso S, Tfelt-Hansen J. Scn1bb r214q found in 3 patients: 1 with brugada syndrome and 2 with lone atrial fibrillation. *Heart Rhythm*. 2012;9:770-773
34. Wang P, Yang Q, Wu X, Yang Y, Shi L, Wang C, Wu G, Xia Y, Yang B, Zhang R, Xu C, Cheng X, Li S, Zhao Y, Fu F, Liao Y, Fang F, Chen Q, Tu X, Wang QK. Functional dominant-negative mutation of sodium channel subunit gene scn3b associated with atrial fibrillation in a chinese geneid population. *Biochem Biophys Res Commun*. 2010;398:98-104
35. Li RG, Wang Q, Xu YJ, Zhang M, Qu XK, Liu X, Fang WY, Yang YQ. Mutations of the scn4b-encoded sodium channel beta4 subunit in familial atrial fibrillation. *Int J Mol Med*. 2013;32:144-150
36. Jabbari J, Olesen MS, Yuan L, Nielsen JB, Liang B, Macri V, Christophersen IE, Nielsen N, Sajadieh A, Ellinor PT, Grunnet M, Haunso S, Holst AG, Svendsen JH, Jespersen T. Common and rare variants in scn10a modulate the risk of atrial fibrillation. *Circ Cardiovasc Genet*. 2015;8:64-73
37. Savio-Galimberti E, Weeke P, Muhammad R, Blair M, Ansari S, Short L, Atack TC, Kor K, Vanoye CG, Olesen MS, LuCamp, Yang T, George AL, Jr., Roden DM, Darbar D. Scn10a/nav1.8 modulation of peak and late sodium currents in patients with early onset atrial fibrillation. *Cardiovasc Res*. 2014;104:355-363
38. Zhang X, Chen S, Yoo S, Chakrabarti S, Zhang T, Ke T, Oberti C, Yong SL, Fang F, Li L, de la Fuente R, Wang L, Chen Q, Wang QK. Mutation in nuclear pore component nup155 leads to atrial fibrillation and early sudden cardiac death. *Cell*. 2008;135:1017-1027
39. Thibodeau IL, Xu J, Li Q, Liu G, Lam K, Veinot JP, Birnie DH, Jones DL, Krahn AD, Lemery R, Nicholson BJ, Gollob MH. Paradigm of genetic mosaicism and lone atrial fibrillation: Physiological characterization of a connexin 43-deletion mutant identified from atrial tissue. *Circulation*. 2010;122:236-244
40. Gollob MH, Jones DL, Krahn AD, Danis L, Gong XQ, Shao Q, Liu X, Veinot JP, Tang AS, Stewart AF, Tesson F, Klein GJ, Yee R, Skanes AC, Guiraudon GM, Ebihara L, Bai D. Somatic mutations in the connexin 40 gene (gja5) in atrial fibrillation. *N.Engl.J Med*. 2006;354:2677-2688
41. Wirka RC, Gore S, Van Wagoner DR, Arking DE, Lubitz SA, Lunetta KL, Benjamin EJ, Alonso A, Ellinor PT, Barnard J, Chung MK, Smith JD. A common connexin-40 gene promoter variant affects connexin-40 expression in human atria and is associated with atrial fibrillation. *Circ Arrhythm Electrophysiol*. 2011;4:87-93
42. Shi HF, Yang JF, Wang Q, Li RG, Xu YJ, Qu XK, Fang WY, Liu X, Yang YQ. Prevalence and spectrum of gja5 mutations associated with lone atrial fibrillation. *Molecular medicine reports*. 2013;7:767-774
43. Hodgson-Zingman DM, Karst ML, Zingman LV, Heublein DM, Darbar D, Herron KJ, Ballew JD, de Andrade M, Burnett JC, Jr., Olson TM. Atrial natriuretic peptide frameshift mutation in familial atrial fibrillation. *N Engl J Med*. 2008;359:158-165
44. Ren X, Xu C, Zhan C, Yang Y, Shi L, Wang F, Wang C, Xia Y, Yang B, Wu G, Wang P, Li X, Wang D, Xiong X, Liu J, Liu Y, Liu M, Liu J, Tu X, Wang QK. Identification of nppa variants associated with atrial fibrillation in a chinese geneid population. *Clin Chim Acta*. 2010;411:481-485

45. Abraham RL, Yang T, Blair M, Roden DM, Darbar D. Augmented potassium current is a shared phenotype for two genetic defects associated with familial atrial fibrillation. *J Mol Cell Cardiol.* 2010;48:181-190
46. Tsai CT, Hsieh CS, Chang SN, Chuang EY, Juang JM, Lin LY, Lai LP, Hwang JJ, Chiang FT, Lin JL. Next-generation sequencing of nine atrial fibrillation candidate genes identified novel de novo mutations in patients with extreme trait of atrial fibrillation. *Journal of medical genetics.* 2015;52:28-36
47. Martin RI, Babaei MS, Choy MK, Owens WA, Chico TJ, Keenan D, Yonan N, Koref MS, Keavney BD. Genetic variants associated with risk of atrial fibrillation regulate expression of pitx2, cav1, myoz1, c9orf3 and fanc. *J Mol Cell Cardiol.* 2015;85:207-214
48. Wang J, Sun YM, Yang YQ. Mutation spectrum of the gata4 gene in patients with idiopathic atrial fibrillation. *Molecular biology reports.* 2012;39:8127-8135
49. Jiang JQ, Shen FF, Fang WY, Liu X, Yang YQ. Novel gata4 mutations in lone atrial fibrillation. *Int J Mol Med.* 2011;28:1025-1032
50. Yang YQ, Wang MY, Zhang XL, Tan HW, Shi HF, Jiang WF, Wang XH, Fang WY, Liu X. Gata4 loss-of-function mutations in familial atrial fibrillation. *Clin Chim Acta.* 2011;412:1825-1830
51. Gu JY, Xu JH, Yu H, Yang YQ. Novel gata5 loss-of-function mutations underlie familial atrial fibrillation. *Clinics (Sao Paulo).* 2012;67:1393-1399
52. Wang XH, Huang CX, Wang Q, Li RG, Xu YJ, Liu X, Fang WY, Yang YQ. A novel gata5 loss-of-function mutation underlies lone atrial fibrillation. *Int J Mol Med.* 2013;31:43-50
53. Yang YQ, Wang J, Wang XH, Wang Q, Tan HW, Zhang M, Shen FF, Jiang JQ, Fang WY, Liu X. Mutational spectrum of the gata5 gene associated with familial atrial fibrillation. *Int J Cardiol.* 2012;157:305-307
54. Li J, Liu WD, Yang ZL, Yang YQ. Novel gata6 loss-of-function mutation responsible for familial atrial fibrillation. *Int J Mol Med.* 2012;30:783-790
55. Yang YQ, Li L, Wang J, Zhang XL, Li RG, Xu YJ, Tan HW, Wang XH, Jiang JQ, Fang WY, Liu X. Gata6 loss-of-function mutation in atrial fibrillation. *European journal of medical genetics.* 2012;55:520-526
56. Yang YQ, Wang XH, Tan HW, Jiang WF, Fang WY, Liu X. Prevalence and spectrum of gata6 mutations associated with familial atrial fibrillation. *Int J Cardiol.* 2012;155:494-496
57. Yuan F, Qiu XB, Li RG, Qu XK, Wang J, Xu YJ, Liu X, Fang WY, Yang YQ, Liao DN. A novel nkx2-5 loss-of-function mutation predisposes to familial dilated cardiomyopathy and arrhythmias. *Int J Mol Med.* 2015;35:478-486
58. Yu H, Xu JH, Song HM, Zhao L, Xu WJ, Wang J, Li RG, Xu L, Jiang WF, Qiu XB, Jiang JQ, Qu XK, Liu X, Fang WY, Jiang JF, Yang YQ. Mutational spectrum of the nkx2-5 gene in patients with lone atrial fibrillation. *International journal of medical sciences.* 2014;11:554-563
59. Huang RT, Xue S, Xu YJ, Zhou M, Yang YQ. A novel nkx2.5 loss-of-function mutation responsible for familial atrial fibrillation. *Int J Mol Med.* 2013;31:1119-1126
60. Beavers DL, Wang W, Ather S, Voigt N, Garbino A, Dixit SS, Landstrom AP, Li N, Wang Q, Olivotto I, Dobrev D, Ackerman MJ, Wehrens XH. Mutation e169k in junctophilin-2 causes atrial fibrillation due to impaired ryr2 stabilization. *J Am Coll Cardiol.* 2013;62:2010-2019
61. Chen S, Wang C, Wang X, Xu C, Wu M, Wang P, Tu X, Wang QK. Significant association between cav1 variant rs3807989 on 7p31 and atrial fibrillation in a chinese han population. *Journal of the American Heart Association.* 2015;4
62. Liu Y, Ni B, Lin Y, Chen XG, Chen M, Hu Z, Zhang F. The rs3807989 g/a polymorphism in cav1 is associated with the risk of atrial fibrillation in chinese han populations. *Pacing Clin Electrophysiol.* 2015;38:164-170



63. Wang J, Zhang DF, Sun YM, Yang YQ. A novel pitx2c loss-of-function mutation associated with familial atrial fibrillation. *European journal of medical genetics*. 2014;57:25-31
64. Zhou YM, Zheng PX, Yang YQ, Ge ZM, Kang WQ. A novel pitx2c loss-of-function mutation underlies lone atrial fibrillation. *Int J Mol Med*. 2013;32:827-834
65. Yang YQ, Xu YJ, Li RG, Qu XK, Fang WY, Liu X. Prevalence and spectrum of pitx2c mutations associated with familial atrial fibrillation. *Int J Cardiol*. 2013;168:2873-2876
66. Zhabyeyev P, Hiess F, Wang R, Liu Y, Wayne Chen SR, Oudit GY. S4153r is a gain-of-function mutation in the cardiac Ca<sup>2+</sup> release channel ryanodine receptor associated with catecholaminergic polymorphic ventricular tachycardia and paroxysmal atrial fibrillation. *The Canadian journal of cardiology*. 2013;29:993-996
67. Kazemian P, Gollob MH, Pantano A, Oudit GY. A novel mutation in the ryr2 gene leading to catecholaminergic polymorphic ventricular tachycardia and paroxysmal atrial fibrillation: Dose-dependent arrhythmia-event suppression by beta-blocker therapy. *The Canadian journal of cardiology*. 2011;27:870 e877-810
68. Ellinor PT, Lunetta KL, Glazer NL, Pfeufer A, Alonso A, Chung MK, Sinner MF, de Bakker PI, Mueller M, Lubitz SA, Fox E, Darbar D, Smith NL, Smith JD, Schnabel RB, Soliman EZ, Rice KM, Van Wagoner DR, Beckmann BM, van Noord C, Wang K, Ehret GB, Rotter JI, Hazen SL, Steinbeck G, Smith AV, Launer LJ, Harris TB, Makino S, Nelis M, Milan DJ, Perz S, Esko T, Kottgen A, Moebus S, Newton-Cheh C, Li M, Mohlenkamp S, Wang TJ, Kao WH, Vasan RS, Nothen MM, MacRae CA, Stricker BH, Hofman A, Uitterlinden AG, Levy D, Boerwinkle E, Metspalu A, Topol EJ, Chakravarti A, Gudnason V, Psaty BM, Roden DM, Meitinger T, Wichmann HE, Witteman JC, Barnard J, Arking DE, Benjamin EJ, Heckbert SR, Kaab S. Common variants in KCNN3 are associated with lone atrial fibrillation. *Nat Genet*. 2010;42:240-244
69. Ellinor PT, Lunetta KL, Albert CM, Glazer NL, Ritchie MD, Smith AV, Arking DE, Muller-Nurasyid M, Krijthe BP, Lubitz SA, Bis JC, Chung MK, Dorr M, Ozaki K, Roberts JD, Smith JG, Pfeufer A, Sinner MF, Lohman K, Ding J, Smith NL, Smith JD, Rienstra M, Rice KM, Van Wagoner DR, Magnani JW, Wakili R, Clauss S, Rotter JI, Steinbeck G, Launer LJ, Davies RW, Borkovich M, Harris TB, Lin H, Volker U, Volzke H, Milan DJ, Hofman A, Boerwinkle E, Chen LY, Soliman EZ, Voight BF, Li G, Chakravarti A, Kubo M, Tedrow UB, Rose LM, Ridker PM, Conen D, Tsunoda T, Furukawa T, Sotoodehnia N, Xu S, Kamatani N, Levy D, Nakamura Y, Parvez B, Mahida S, Furie KL, Rosand J, Muhammad R, Psaty BM, Meitinger T, Perz S, Wichmann HE, Witteman JC, Kao WH, Kathiresan S, Roden DM, Uitterlinden AG, Rivadeneira F, McKnight B, Sjogren M, Newman AB, Liu Y, Gollob MH, Melander O, Tanaka T, Stricker BH, Felix SB, Alonso A, Darbar D, Barnard J, Chasman DI, Heckbert SR, Benjamin EJ, Gudnason V, Kaab S. Meta-analysis identifies six new susceptibility loci for atrial fibrillation. *Nat Genet*. 2012;44:670-675
70. Gudbjartsson DF, Arnar DO, Helgadóttir A, Gretarsdóttir S, Holm H, Sigurdsson A, Jonasdóttir A, Baker A, Thorleifsson G, Kristjansson K, Pálsson A, Blondal T, Sulem P, Backman VM, Hardarson GA, Palsdóttir E, Helgason A, Sigurjonsdóttir R, Sverrisson JT, Kostulas K, Ng MC, Baum L, So WY, Wong KS, Chan JC, Furie KL, Greenberg SM, Sale M, Kelly P, MacRae CA, Smith EE, Rosand J, Hillert J, Ma RC, Ellinor PT, Thorgeirsson G, Gulcher JR, Kong A, Thorsteinsdóttir U, Stefansson K. Variants conferring risk of atrial fibrillation on chromosome 4q25. *Nature*. 2007;448:353-357
71. Benjamin EJ, Rice KM, Arking DE, Pfeufer A, van Noord C, Smith AV, Schnabel RB, Bis JC, Boerwinkle E, Sinner MF, Dehghan A, Lubitz SA, D'Agostino RB, Sr., Lumley T, Ehret GB, Heeringa J, Aspelund T, Newton-Cheh C, Larson MG, Marciante KD, Soliman EZ, Rivadeneira F, Wang TJ, Eiriksdóttir G, Levy D, Psaty BM, Li M, Chamberlain AM, Hofman A, Vasan RS, Harris TB, Rotter JI, Kao WH, Agarwal SK, Stricker BH, Wang K, Launer LJ, Smith NL, Chakravarti A, Uitterlinden AG, Wolf PA, Sotoodehnia N, Kottgen A, van Duijn CM, Meitinger T, Mueller M, Perz S, Steinbeck G, Wichmann HE, Lunetta KL, Heckbert SR, Gudnason V, Alonso A, Kaab S, Ellinor PT, Witteman JC.

Variants in *zfhx3* are associated with atrial fibrillation in individuals of european ancestry. *Nat Genet.* 2009;41:879-881

72. Sinner MF, Tucker NR, Lunetta KL, Ozaki K, Smith JG, Trompet S, Bis JC, Lin H, Chung MK, Nielsen JB, Lubitz SA, Krijthe BP, Magnani JW, Ye J, Gollob MH, Tsunoda T, Muller-Nurasyid M, Lichtner P, Peters A, Dolmatova E, Kubo M, Smith JD, Psaty BM, Smith NL, Jukema JW, Chasman DI, Albert CM, Ebana Y, Furukawa T, MacFarlane P, Harris TB, Darbar D, Dorr M, Holst AG, Svendsen JH, Hofman A, Uitterlinden A, Gudnason V, Isobe M, Malik R, Dichgans M, Rosand J, Van Wagoner DR, Consortium M, Consortium AF, Benjamin EJ, Milan DJ, Melander O, Heckbert S, Ford I, Liu Y, Barnard J, Olesen MS, Stricker BH, Tanaka T, Kaab S, Ellinor PT. Integrating genetic, transcriptional, and functional analyses to identify five novel genes for atrial fibrillation. *Circulation.* 2014
